# Supplementary material for: Offspring of Depressed Parents: 30 Years Later
Source: Atypon-hosted journal article supplement (doi:10.1176/appi.ajp.2016.15101327), 2016-04-26
Supplement: appi.ajp.2016.15101327.ds001.pdf [file appi.ajp.2016.15101327.ds001.pdf]

 


Psychiatry Online
