# Supplementary material for: Offspring of Depressed Parents: 30 Years Later
Source: Atypon-hosted journal article supplement (doi:10.1176/appi.ajp.2016.15101327), 2016-04-26
Supplement: appi.ajp.2016.15101327.ds001.pdf [file appi.ajp.2016.15101327.ds001.pdf]

**Table S1.** Cumulative Rates of Psychiatric Disorders in the Presence Of Impairment<sup>a</sup> (GAS  $\leq$  70) in Offspring (G2) of Depressed and Nondepressed Parents (G1)

| Diagnosis in Offspring<br>in the Presence of Impairment <sup>a</sup> | Cumulative Rate (%)                                                                  |                                                                           | Analysis                      |                    |            |
|----------------------------------------------------------------------|--------------------------------------------------------------------------------------|---------------------------------------------------------------------------|-------------------------------|--------------------|------------|
|                                                                      | Offspring Having One or<br>More Parents With Major<br>Depressive Disorder<br>(n=103) | Offspring Having No<br>Parent with Major<br>Depressive Disorder<br>(n=44) | Relative<br>Risk <sup>b</sup> | 95% CI             | p          |
| <b>Any mood disorder</b>                                             | <b>21.4</b>                                                                          | <b>2.3</b>                                                                | <b>10.50</b>                  | <b>1.33, 82.66</b> | <b>.03</b> |
| <b>Major depressive disorder</b>                                     | <b>17.5</b>                                                                          | <b>2.3</b>                                                                | <b>8.22</b>                   | <b>1.05, 64.30</b> | <b>.04</b> |
| Bipolar I or II disorder                                             | 5.8                                                                                  | 0.0                                                                       | – <sup>c</sup>                | –                  | –          |
| Dysthymic disorder                                                   | 12.6                                                                                 | 2.3                                                                       | 5.98                          | 0.74, 48.50        | .09        |
| <b>Any anxiety disorder</b>                                          | <b>18.5</b>                                                                          | <b>2.3</b>                                                                | <b>8.55</b>                   | <b>1.08, 67.64</b> | <b>.04</b> |
| Phobia                                                               | 16.5                                                                                 | 2.3                                                                       | 7.41                          | 0.93, 59.32        | .06        |
| Panic disorder                                                       | 4.9                                                                                  | 2.3                                                                       | 2.11                          | 0.25, 17.96        | .49        |
| Obsessive-compulsive disorder                                        | 3.9                                                                                  | 0.0                                                                       | – <sup>c</sup>                | –                  | –          |
| Generalized anxiety disorder <sup>d</sup>                            | 3.9                                                                                  | 0.0                                                                       | – <sup>c</sup>                | –                  | –          |
| Any substance abuse                                                  | 1.0                                                                                  | 2.3                                                                       | 0.43                          | 0.03, 5.22         | .50        |
| Any substance dependence                                             | 10.7                                                                                 | 0.0                                                                       | – <sup>c</sup>                | –                  | –          |
| Alcohol dependence                                                   | 8.7                                                                                  | 0.0                                                                       | – <sup>c</sup>                | –                  | –          |
| Drug dependence                                                      | 5.8                                                                                  | 0.0                                                                       | – <sup>c</sup>                | –                  | –          |
| Schizophrenia                                                        | 1.9                                                                                  | 0.0                                                                       | – <sup>c</sup>                | –                  | –          |
| Any of the disorders above                                           | 21.4                                                                                 | 2.3                                                                       | 10.39                         | 1.30, 82.79        | .03        |

<sup>a</sup>Impairment defined as a mean score  $\leq$  70 on the Global Assessment Scale (GAS). Mean GAS scores were calculated as the average of all available GAS scores for each subject, with one score given during each wave in which the subject was interviewed.

<sup>b</sup>Adjusted for gender and age at last interview of the offspring using Cox proportional hazards regression models. Possible nonindependence of outcomes of family members was adjusted by using the SUDAAN software package.

<sup>c</sup>Cannot be reliably calculated.

<sup>d</sup>Includes overanxious disorder of childhood.

**Table S2.** Cumulative Rates of Psychiatric Disorders in the Presence Of Impairment<sup>a</sup> (GAS  $\leq$  75) in Offspring (G2) of Depressed and Nondepressed Parents (G1)

| Diagnosis in Offspring<br>in the Presence of Impairment <sup>a</sup> | Cumulative Rate (%)                                                                |                                                                           | Analysis                      |             |      |
|----------------------------------------------------------------------|------------------------------------------------------------------------------------|---------------------------------------------------------------------------|-------------------------------|-------------|------|
|                                                                      | Offspring Having 1 or<br>More Parents With<br>Major Depressive<br>Disorder (n=103) | Offspring Having No<br>Parent with Major<br>Depressive Disorder<br>(n=44) | Relative<br>Risk <sup>b</sup> | 95% CI      | p    |
| Any mood disorder                                                    | 35.0                                                                               | 11.4                                                                      | 3.48                          | 1.31, 9.25  | .01  |
| Major depressive disorder                                            | 30.1                                                                               | 9.1                                                                       | 3.58                          | 1.25, 10.26 | .02  |
| Bipolar I or II disorder                                             | 7.8                                                                                | 4.6                                                                       | 1.70                          | 0.32, 9.05  | .53  |
| Dysthymic disorder                                                   | 19.4                                                                               | 11.4                                                                      | 1.78                          | 0.64, 4.97  | .26  |
| Any anxiety disorder                                                 | 30.1                                                                               | 9.1                                                                       | 3.57                          | 1.19, 10.72 | .02  |
| Phobia                                                               | 24.3                                                                               | 9.1                                                                       | 2.65                          | 0.87, 8.10  | .09  |
| Panic disorder                                                       | 8.7                                                                                | 4.6                                                                       | 2.08                          | 0.46, 9.42  | .34  |
| Obsessive-compulsive disorder                                        | 3.9                                                                                | 0.0                                                                       | – <sup>c</sup>                | –           | –    |
| Generalized anxiety disorder <sup>d</sup>                            | 9.7                                                                                | 2.3                                                                       | 0.42                          | 0.04, 4.70  | .48  |
| Any substance abuse                                                  | 5.8                                                                                | 9.1                                                                       | 0.59                          | 0.16, 2.18  | .43  |
| Any substance dependence                                             | 15.5                                                                               | 6.8                                                                       | 2.42                          | 0.66, 8.89  | .18  |
| Alcohol dependence                                                   | 12.6                                                                               | 4.6                                                                       | 2.82                          | 0.58, 13.72 | .20  |
| Drug dependence                                                      | 7.8                                                                                | 2.3                                                                       | 3.78                          | 0.44, 32.67 | .22  |
| Schizophrenia                                                        | 1.9                                                                                | 0.0                                                                       | – <sup>c</sup>                | –           | –    |
| Any of the disorders above                                           | 35.0                                                                               | 15.9                                                                      | 2.34                          | 0.98, 5.58  | .054 |

<sup>a</sup>Impairment defined as a mean score  $\leq$  75 on the Global Assessment Scale (GAS). Mean GAS scores were calculated as the average of all available GAS scores for each subject, with one score given during each wave in which the subject was interviewed.

<sup>b</sup>Adjusted for gender and age at last interview of the offspring using Cox proportional hazards regression models. Possible nonindependence of outcomes of family members was adjusted by using the SUDAAN software package.

<sup>c</sup>Cannot be reliably calculated.

<sup>d</sup>Includes overanxious disorder of childhood.

**Table S3.** Cumulative Rates of Psychiatric Disorders in the Presence Of Impairment<sup>a</sup> (GAS ≤ 80) in Offspring (G2) of Depressed and Nondepressed Parents (G1)

| Diagnosis in Offspring<br>in the Presence of Impairment <sup>a</sup> | Cumulative Rate (%)                                                                  |                                                                           | Analysis                      |             |       |
|----------------------------------------------------------------------|--------------------------------------------------------------------------------------|---------------------------------------------------------------------------|-------------------------------|-------------|-------|
|                                                                      | Offspring Having One or<br>More Parents With Major<br>Depressive Disorder<br>(n=103) | Offspring Having No<br>Parent with Major<br>Depressive Disorder<br>(n=44) | Relative<br>Risk <sup>b</sup> | 95% CI      | p     |
| Any mood disorder                                                    | 56.3                                                                                 | 25.0                                                                      | 2.87                          | 1.58, 5.21  | .0007 |
| Major depressive disorder                                            | 49.5                                                                                 | 18.2                                                                      | 3.34                          | 1.84, 6.05  | .0001 |
| Bipolar I or II disorder                                             | 12.6                                                                                 | 6.8                                                                       | 1.90                          | 0.51, 7.15  | .34   |
| Dysthymic disorder                                                   | 27.2                                                                                 | 20.5                                                                      | 1.36                          | 0.63, 2.95  | .43   |
| Any anxiety disorder                                                 | 46.6                                                                                 | 18.2                                                                      | 3.05                          | 1.63, 5.73  | .0007 |
| Phobia                                                               | 36.9                                                                                 | 13.6                                                                      | 3.39                          | 1.28, 8.98  | .01   |
| Panic disorder                                                       | 12.6                                                                                 | 4.6                                                                       | 3.06                          | 0.71, 13.21 | .13   |
| Obsessive-compulsive disorder                                        | 4.9                                                                                  | 0.0                                                                       | – <sup>c</sup>                | –           | –     |
| Generalized anxiety disorder <sup>d</sup>                            | 13.6                                                                                 | 4.6                                                                       | 0.42                          | 0.04, 4.69  | .48   |
| Any substance abuse                                                  | 7.8                                                                                  | 11.4                                                                      | 0.64                          | 0.20, 2.07  | .45   |
| Any substance dependence                                             | 22.3                                                                                 | 9.1                                                                       | 2.60                          | 0.85, 7.92  | .09   |
| Alcohol dependence                                                   | 17.5                                                                                 | 6.8                                                                       | 2.60                          | 0.71, 9.50  | .15   |
| Drug dependence                                                      | 10.7                                                                                 | 2.3                                                                       | 4.96                          | 0.61, 40.31 | .13   |
| Schizophrenia                                                        | 1.9                                                                                  | 0.0                                                                       | – <sup>c</sup>                | –           | –     |
| Any of the disorders above                                           | 58.3                                                                                 | 29.6                                                                      | 2.37                          | 1.31, 4.29  | .005  |

<sup>a</sup>Impairment defined as a mean score ≤ 80 on the Global Assessment Scale (GAS). Mean GAS scores were calculated as the average of all available GAS scores for each subject, with one score given during each wave in which the subject was interviewed.

<sup>b</sup>Adjusted for gender and age at last interview of the offspring using Cox proportional hazards regression models. Possible nonindependence of outcomes of family members was adjusted by using the SUDAAN software package.

<sup>c</sup>Cannot be reliably calculated.

<sup>d</sup>Includes overanxious disorder of childhood.

**Table S4.** Medical Conditions Reported Across 30 Years, by Parental Depression Status (N = 147)

| Medical Condition in Offspring  | Cumulative Rate (%)                                          |                                                     | Analysis <sup>a</sup> |            |     |
|---------------------------------|--------------------------------------------------------------|-----------------------------------------------------|-----------------------|------------|-----|
|                                 | Offspring Having<br>1 or More Parents<br>With MDD<br>(n=103) | Offspring Having<br>No Parent<br>with MDD<br>(n=44) | Odds Ratio            | 95% CI     | p   |
| Cancer                          | 5.9                                                          | 2.3                                                 | 2.61 <sup>b</sup>     | 0.31, 21.7 | .38 |
| Cardiovascular disease          | 29.4                                                         | 29.6                                                | 0.94                  | 0.43, 2.06 | .88 |
| Dermatologic disorder           | 34.3                                                         | 27.3                                                | 1.45                  | 0.70, 3.00 | .31 |
| Endocrine-related illness       | 12.8                                                         | 9.1                                                 | 1.36                  | 0.47, 3.93 | .57 |
| Gastrointestinal illness        | 37.3                                                         | 31.8                                                | 1.11                  | 0.46, 2.68 | .82 |
| Genital-urinary disorder        | 21.6                                                         | 22.7                                                | 0.87                  | 0.40, 1.93 | .74 |
| Hematologic disorder            | 22.6                                                         | 20.5                                                | 1.05                  | 0.41, 2.69 | .91 |
| Infectious disease              | 2.0                                                          | 0.0                                                 | – <sup>c</sup>        | –          | –   |
| Metabolic illness               | 28.4                                                         | 27.3                                                | 1.02                  | 0.49, 2.14 | .96 |
| Musculoskeletal disorder        | 19.6                                                         | 22.7                                                | 0.81                  | 0.35, 1.85 | .62 |
| Neuromuscular disorder          | 62.8                                                         | 52.3                                                | 1.61                  | 0.70, 3.70 | .26 |
| Respiratory illness             | 35.3                                                         | 29.6                                                | 1.39                  | 0.61, 3.19 | .44 |
| Systemic illness                | 68.6                                                         | 65.9                                                | 1.10                  | 0.48, 2.53 | .82 |
| Any of these medical conditions | 97.1                                                         | 95.5                                                | 1.44                  | 0.26, 8.00 | .68 |

<sup>a</sup> Analyses based on logistic regressions with a statistical adjustment for age at last interview and gender of offspring. Adjustment for nonindependence of observations due to more than one offspring in the same family was made by using generalized estimating equation (GEE) procedures.

<sup>b</sup> Does not adjust for gender because all 7 offspring who reported cancer (6 in the high-risk group and 1 in the low-risk group) were female.

<sup>c</sup> Cannot be reliably calculated.

**Figure S1.** Cumulative Risk of First Onset Depression Between 20 and 40 years of Age, by Risk Status

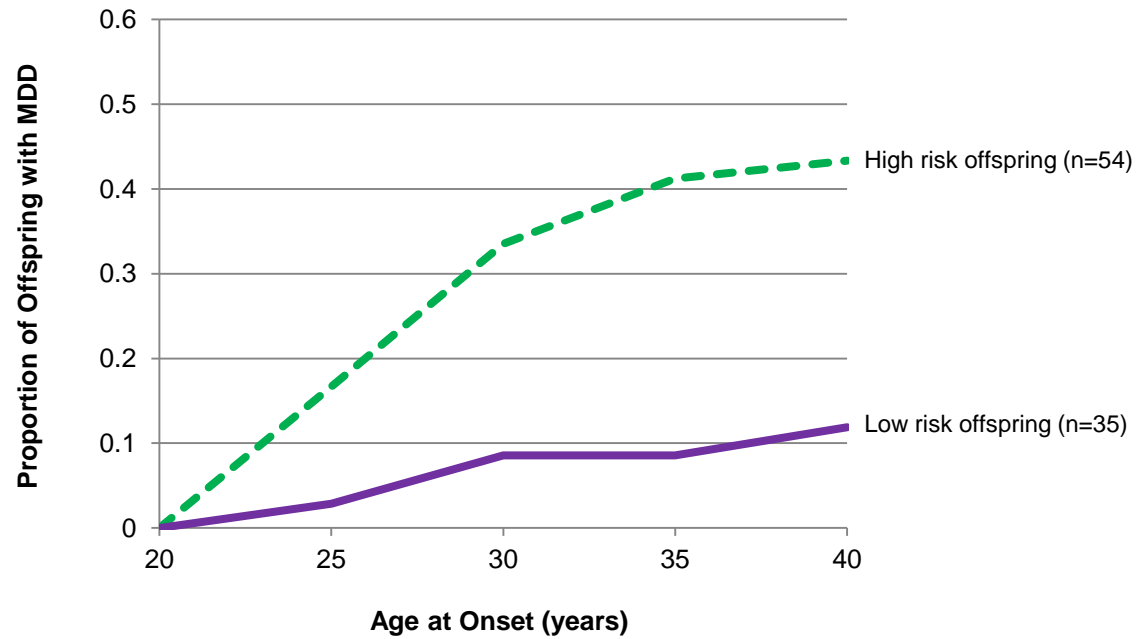

*Note.* Includes all subjects who had not had an onset of MDD prior to age 20. The curves for high risk and low risk offspring are significantly different, log-rank chi-square=9.49, df=1, p=0.002.

**Figure S2.** Cumulative Risk of First Onset Depression Between 40 and 60 years of Age, by Risk Status

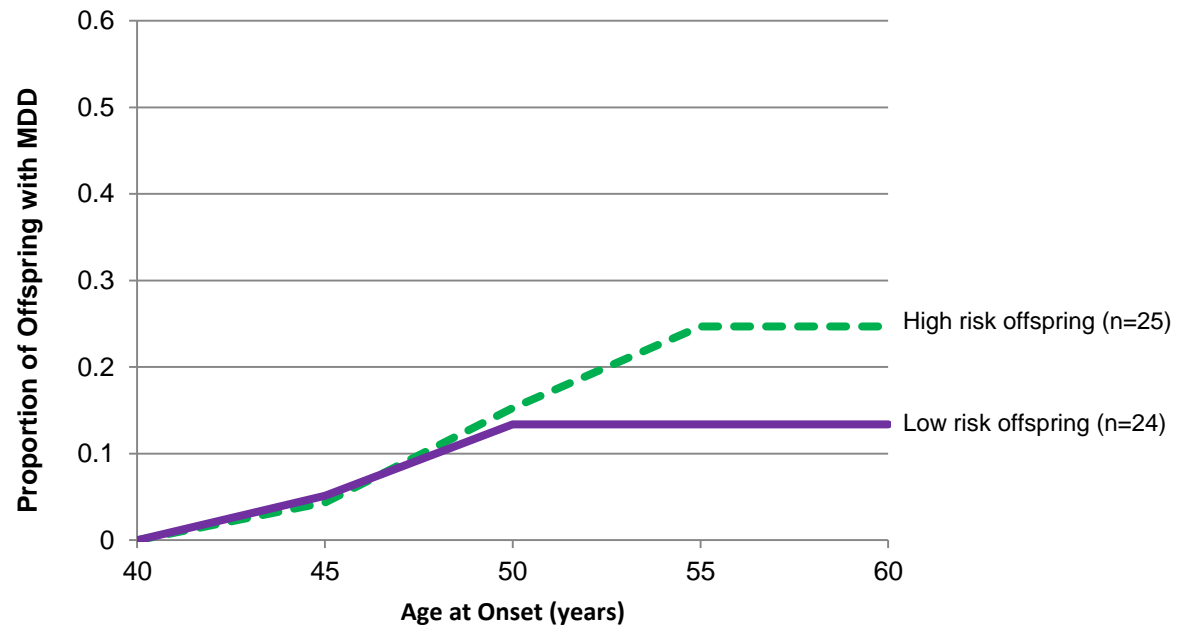

*Note.* Includes all subjects who had not had an onset of MDD prior to age 40. The curves for high risk and low risk offspring are not significantly different, log-rank chi-square=0.25, df=1, p=0.62.
